# Supplementary material
Source: publisher site journal article supplement (https://www.dovepress.com/article/410953)
Supplement: Supplementary file 1 [file get_supplementary_file.php]

**Supplementary Figure 1:** A survey of attitudes and reactions of first year medical students towards the physician-patient communication course, at the beginning of the COVID-19 crisis

**Part 1**

**Choose one of the following options:**

| 1. | In what way has your ambition to become a physician changed, when you witnessed how healthcare systems and medical teams in Israel and around the world responded to the COVID-19 crisis? |
| --- | --- |

| C. Has strengthened my ambition | B. Has not changed my ambition | A. Has affected my ambition negatively |
| --- | --- | --- |

**Part 2**

Rate all items using the following response scale:

| To a very small extent | To a small extent |  | Moderately  /average |  | To a large extent | To a very large extent |
| --- | --- | --- | --- | --- | --- | --- |
| **1** | **2** | **3** | **4** | **5** | **6** | **7** |

| 1. | To what extend do you feel already a part of the healthcare/medical system in Israel? |
| --- | --- |
| 2. | To what extent has your witnessing media coverage of the challenges and difficulties facing medical personnel taking care of COVID – 19 patients around the world and in Israel made you view the medical profession as a risk to your health? |
| 3. | To what extent do you empathize with medical staff/personnel in Israel? |
| 4 | To what extent do you believe you are able to empathize with COVID -19 patients who, despite specific instructions, were exposed deliberately to the virus (e.g. participated in parties, did not practice social isolation or keep adequate hygiene practices)? |
| 5. | As a medical student at this point in time, to what extent do you think you are able to conduct a medical interview (as taught in the physician-patient communication course so far) independently/on your own? |
| 6. | At this point in time, to what extent do you view your supervisors in the physician-patient communication course as your role models of interpersonal communication skills? |
| 7. | To what extent do you view the learning of communication skills an essential part of medical education? |
| 8. | To what extent are your peers in the communication course helping you with the demands of medical studies? |
| 9. | To what extent do you feel you are important to your peers in the small group in the communication course? |
| 10. | I am sensitive to the needs of other students |
| 11. | I feel I am able to empathize with other students |
